# Supplementary material for: Clinicopathologic Features and Long-Term Outcomes of Elderly Breast Cancer Patients: Experiences at a Single Institution in Korea
Source: PubMed Central journal article supplement — Cancer Res Treat. 2016 Mar 11;48(4):1382–8. doi: 10.4143/crt.2015.423 (PMC5080825; doi:10.4143/crt.2015.423), 2016-03-11
Supplement: crt-2015-423-supple.pdf [file crt-2015-423-supple.pdf]

# Clinicopathologic Features and Long-Term Outcomes of Elderly Breast Cancer Patients: Experiences at a Single Institution in Korea

**Hee Kyung Kim, MD<sup>1</sup>, Jun Soo Ham, MD<sup>1</sup>, Seonggyu Byeon, MD<sup>1</sup>, Kwai Han Yoo, MD<sup>1</sup>, Ki Sun Jung, MD<sup>1</sup>, Haa-Na Song, MD<sup>1</sup>, Jinhyun Cho, MD<sup>1</sup>, Ji Yun Lee, MD<sup>1</sup>, Sung Hee Lim, MD<sup>1</sup>, Hae Su Kim, MD<sup>1</sup>, Ji-Yeon Kim, MD<sup>1</sup>, Jeong Eon Lee, MD, PhD<sup>2</sup>, Seok Won Kim, MD, PhD<sup>2</sup>, Seok Jin Nam, MD, PhD<sup>2</sup>, Se Kyung Lee, MD, PhD<sup>2</sup>, Soo Youn Bae, MD, PhD<sup>2</sup>, Jin Seok Ahn, MD, PhD<sup>1</sup>, Young-Hyuck Im, MD, PhD<sup>1</sup>, Yeon Hee Park, MD, PhD<sup>1</sup>**

<sup>1</sup>*Division of Hematology-Oncology, Department of Internal Medicine,*

<sup>2</sup>*Department of Surgery, Samsung Medical Center, Sungkyunkwan University School of Medicine, Seoul, Korea*

## Supplementary Data

### Table of Contents

|                             |   |
|-----------------------------|---|
| Supplementary Table 1 ..... | 2 |
| Supplementary Table 2 ..... | 3 |

**Supplementary Table 1.** Univariate analysis for RFSR

| Variable                          | Age < 65 yr           |         | Age ≥ 65 yr           |         |
|-----------------------------------|-----------------------|---------|-----------------------|---------|
|                                   | 5-Yr RFSR (95% CI, %) | p-value | 5-Yr RFSR (95% CI, %) | p-value |
| <b>TNM stage at diagnosis</b>     |                       |         |                       |         |
| I                                 | 93.3 (92.1-94.5)      | < 0.001 | 88.4 (82.5-94.3)      | < 0.001 |
| II                                | 89.3 (87.9-90.7)      |         | 84.8 (78.8-90.9)      |         |
| III                               | 69.5 (65.9-73.0)      |         | 69.4 (56.1-82.7)      |         |
| <b>Subtypes</b>                   |                       |         |                       |         |
| HR(+)/HER2(-)                     | 90.9 (89.7-92.1)      | < 0.001 | 88.4 (82.5-94.3)      | 0.159   |
| HR(+)/HER2(+)                     | 81.9 (77.9-85.8)      |         | 84.0 (69.7-98.3)      |         |
| HR(-)/HER2(+)                     | 81.6 (78.1-85.1)      |         | 88.8 (78.4-99.2)      |         |
| TNBC                              | 84.2 (81.4-86.9)      |         | 76.7 (65.9-87.5)      |         |
| <b>Nuclear grade</b>              |                       |         |                       |         |
| I                                 | 95.5 (93.7-97.3)      | < 0.001 | 91.3 (83.1-99.5)      | 0.006   |
| II                                | 88.8 (87.2-90.4)      |         | 86.9 (80.8-92.9)      |         |
| III                               | 83.8 (82.0-85.6)      |         | 76.2 (68.4-84.0)      |         |
| <b>Histologic grade</b>           |                       |         |                       |         |
| Low                               | 96.9 (95.5-98.3)      | < 0.001 | 92.6 (85.5-99.7)      | 0.034   |
| Intermediate                      | 88.8 (87.2-90.4)      |         | 83.2 (76.3-90.1)      |         |
| High                              | 81.5 (79.5-83.5)      |         | 79.3 (71.1-87.5)      |         |
| <b>Ki-67 (%)</b>                  |                       |         |                       |         |
| < 50                              | 92.8 (91.4-94.2)      | < 0.001 | 85.1 (78.6-91.6)      | 0.425   |
| ≥ 50                              | 83.8 (80.9-86.7)      |         | 82.3 (72.3-92.3)      |         |
| <b>Lymphovascular invasion</b>    |                       |         |                       |         |
| Yes                               | 87.7 (83.8-91.6)      | < 0.001 | 52.3 (28.2-76.4)      | 0.001   |
| No                                | 95.9 (94.3-94.5)      |         | 91.6 (84.5-98.7)      |         |
| <b>Adjuvant chemotherapy</b>      |                       |         |                       |         |
| Yes                               | 86.8 (85.6-87.9)      | < 0.001 | 83.3 (77.2-89.4)      | 0.293   |
| No                                | 91.4 (89.4-93.4)      |         | 84.4 (78.3-90.5)      |         |
| <b>Adjuvant radiotherapy</b>      |                       |         |                       |         |
| Yes                               | 88.0 (86.8-89.2)      | 0.425   | 84.7 (78.8-90.6)      | 0.83    |
| No                                | 86.9 (84.9-88.9)      |         | 83.0 (76.9-89.1)      |         |
| <b>Adjuvant endocrine therapy</b> |                       |         |                       |         |
| Yes                               | 90.0 (88.8-91.2)      | < 0.001 | 86.2 (80.9-91.5)      | 0.387   |
| No                                | 83.1 (81.1-85.1)      |         | 80.5 (73.2-87.8)      |         |

RFSR, recurrence-free survival rate; CI, confidence interval; HR, hormone receptor; TNBC, triple negative breast cancer.

**Supplementary Table 2.** Univariate analysis for OSR

| Variable                          | Age < 65 yr          |         | Age ≥ 65 yr          |         |
|-----------------------------------|----------------------|---------|----------------------|---------|
|                                   | 5-Yr OSR (95% CI, %) | p-value | 5-Yr OSR (95% CI, %) | p-value |
| <b>TNM stage at diagnosis</b>     |                      |         |                      |         |
| I                                 | 98.1 (97.5-98.7)     | < 0.001 | 94.7 (90.6-98.5)     | < 0.001 |
| II                                | 95.0 (94.1-96.1)     |         | 91.8 (87.1-96.5)     |         |
| III                               | 83.1 (80.2-86.1)     |         | 83.5 (72.1-94.9)     |         |
| <b>Subtypes</b>                   |                      |         |                      |         |
| HR(+)/HER2(-)                     | 97.1 (96.5-97.7)     | < 0.001 | 92.4 (88.5-96.3)     | 0.489   |
| HR(+)/HER2(+)                     | 93.0 (90.5-95.5)     |         | 100                  |         |
| HR(-)/HER2(+)                     | 90.2 (87.5-92.9)     |         | 88.4 (77.6-99.2)     |         |
| TNBC                              | 88.7 (86.3-91.1)     |         | 88.0 (79.6-96.4)     |         |
| <b>Nuclear grade</b>              |                      |         |                      |         |
| I                                 | 99.6 (99.0-100)      | < 0.001 | 95.8 (90.1-100)      | 0.322   |
| II                                | 95.3 (94.3-96.3)     |         | 92.7 (88.2-97.2)     |         |
| III                               | 91.4 (90.0-92.8)     |         | 88.0 (81.9-94.1)     |         |
| <b>Histologic grade</b>           |                      |         |                      |         |
| Low                               | 99.4(98.8-99.9)      | < 0.001 | 98.1 (94.6-100)      | 0.019   |
| Intermediate                      | 95.7 (94.7-96.7)     |         | 93.1 (88.4-97.8)     |         |
| High                              | 89.7 (88.1-91.3)     |         | 87.2 (80.5-93.9)     |         |
| <b>Ki-67 (%)</b>                  |                      |         |                      |         |
| < 50                              | 97.2 (96.4-97.9)     | < 0.001 | 92.3 (87.4-97.4)     | 0.575   |
| ≥ 50                              | 90.9 (88.5-93.3)     |         | 90.9 (83.3-98.5)     |         |
| <b>Lymphovascular invasion</b>    |                      |         |                      |         |
| Yes                               | 94.3 (91.6-97.0)     | < 0.001 | 78.3 (56.5-100)      | < 0.001 |
| No                                | 98.8 (97.8-99.8)     |         | 93.4 (87.1-99.7)     |         |
| <b>Adjuvant chemotherapy</b>      |                      |         |                      |         |
| Yes                               | 94.0 (93.2-94.8)     | 0.003   | 93.6 (89.5-97.7)     | 0.824   |
| No                                | 95.2 (93.6-96.8)     |         | 90.0 (85.3-94.7)     |         |
| <b>Adjuvant radiotherapy</b>      |                      |         |                      |         |
| Yes                               | 94.7 (93.9-95.5)     | 0.055   | 93.8 (93.4-94.2)     | 0.135   |
| No                                | 93.1 (91.7-94.5)     |         | 89.7 (84.8-94.6)     |         |
| <b>Adjuvant endocrine therapy</b> |                      |         |                      |         |
| Yes                               | 97.4 (96.8-97.9)     | < 0.001 | 94.9 (91.6-98.2)     | 0.038   |
| No                                | 88.0 (86.2-89.8)     |         | 86.9 (80.6-93.2)     |         |

OSR, overall survival rate; CI, confidence interval; HR, hormone receptor; TNBC, triple negative breast cancer.
